## Long term outcomes of patients with chronic inflammatory diseases after percutaneous coronary intervention

E. Marcusohn<sup>1</sup>, R. Zukermann<sup>1</sup>, A. Roguin<sup>2</sup>, O. Kobo<sup>2</sup>

<sup>1</sup>Rambam Health Care Campus, Cardiology, Haifa, Israel; <sup>2</sup>Hillel Yaffe Medical Center, Hadera, Israel

**Funding Acknowledgement:** Type of funding sources: None.

**Introduction:** Patients with chronic inflammatory diseases are at increased risk for coronary artery disease.

**Aim:** We aimed to assess the long-term outcomes of patients with chronic inflammatory diseases who underwent percutaneous coronary intervention.

**Methods:** A Retrospective cohort study of all adult (>18 years) patients who underwent PCI in a large [1000 bed] tertiary care center from January 2002 to August 2020.

**Results:** A total of 12,951 patients underwent PCI during the study period and were included in the cohort. The population of chronic inflammatory diseases includes 247/12,951 [1.9%]; 70 with IBD and 173 with AIRD. The composite endpoint of mortality, ACS or CHF admission was more frequent

in the inflammatory disease group (77.5% in AIRD group, 72.9% in the IBD group and 59.6% in the non-inflammatory group,  $p < 0.001$ ). The adjusted cox regression model found a statistically significant increased risk of the composite primary endpoints of around 40% for patients both with AIRD and IBD. The increased risk for ACS was 61% for AIRD patients and 37% for IBD patients. Patients with inflammatory diseases were found to have a significant increased risk CHF admission, while both IBD and AIRD patients had a non-significant increased risk for mortality.

**Conclusion:** Patients with AIRD and IBD are at higher risk for cardiovascular events also in long term follow up once diagnosed with CAD and treated with PCI.
